# Supplementary material
Source: publisher figshare collection journal article supplement (https://karger.figshare.com/ndownloader/files/15017840)
Supplement: Supplementary file 1 [file 15017840]

## Sheet: Sheet1
	Date (Month-Year)	Prolactin Levels (ng/mL)
	04, 1994	3000
	08, 1995	0
	09, 2000	1950
	06, 2003	1500
	09, 2003	3000
	10, 2003	771
	01, 2004	855
	06, 2004	1710
	07, 2004	1986
	10, 2004	3281
	11, 2004	4630
	12, 2004	5160
	02, 2005	4008
	03, 2005	6367
	05, 2005	5084
	08, 2005	6630
	10, 2005	10992
	12, 2005	16135
	03, 2006	7131
	06, 2006	10962
	06, 2006	12050
	09, 2006	9614
	10, 2006	7096
	12, 2006	4000
	02, 2007	13377
	02, 2008	20875
